# Supplementary material
Source: HighWire-hosted journal article supplement (https://www.g3journal.org/content/suppl/2013/10/18/g3.113.007674)
Supplement: FigureS1.pdf [file FigureS1.pdf]

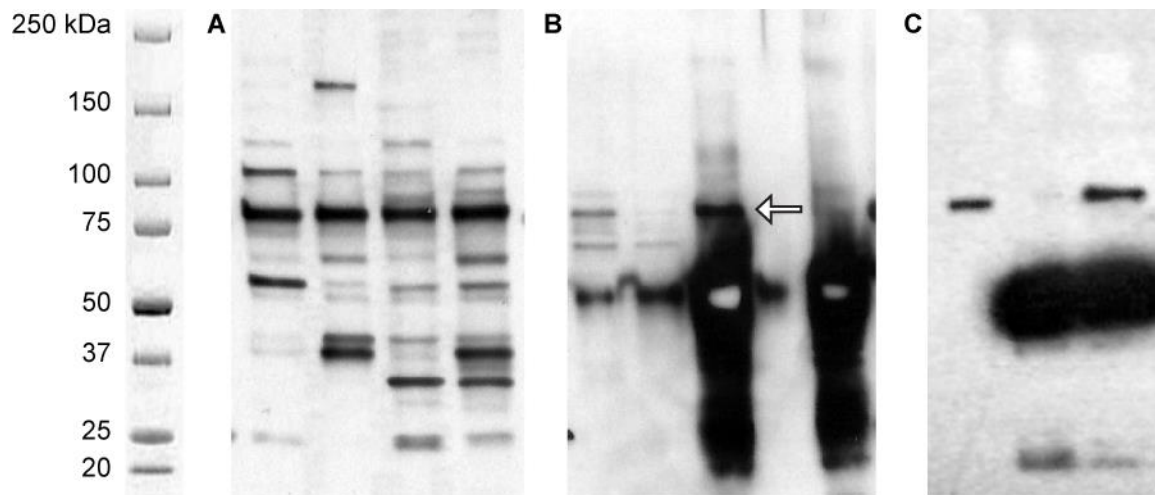

**Figure S1** STAT3 immunoblotting and immunoprecipitation with sc-482. Western blot and IPs show a band consistent with expected size (88 kDa) of STAT3. (A) Western blot using antibody sc-482 versus nuclear lysates. Lanes contain (from left to right) lysate from K562 cells, GM12878 cells, HeLa S3 cells, and HepG2 cells. (B) IP of STAT3 using sc-482 in HeLa S3 cells. *Lane 1*: input nuclear lysate; *lane 2*: unbound material from IP with sc-482; *lane 3*: material IP'd with sc-482; *lane 4*: material IP'd using control rabbit IgG. Arrow indicates the band of interest. (C) IP of STAT3 using sc-482 in K562 cells. *Lane 1*: input nuclear lysate; *lane 2*: material IP'd using control rabbit IgG; *lane 3*: material IP'd with sc-482.
